# Supplementary material for: Monofunctional platinum(ii) dithiocarbamate complexes: synthesis, characterization and anticancer activity
Source: Royal Society of Chemistry journal article supplement (doi:10.1039/c6ra19469a), 2016-01-01
Supplement: c6ra19469a1.pdf [file c6ra19469a1.pdf]

## Supplementary Material

### Crystal packing

These compounds provide an ideal platform to see the effect of various weak CH $\cdots$ X [X = O, F, Cl and  $\pi$ ] non-covalent interactions on the solid state-self-assembly particularly in the absence of strong hydrogen bonds.<sup>1-10</sup> The crystal structure of compounds **1-3** revealed 3D-networks, composed of various 1D-supramolecular chains stabilized by variety of weak non-covalent interactions. The molecules are arranged in head to head fashion in 1D-chains of compound **1** stabilized by C-H $\cdots$ F [(C(18)-H(18) $\cdots$ F(2A) 2.529 Å, (C(17)-H(17) $\cdots$ F(2A) 2.648 Å, (C(30)-H(30) $\cdots$ F(2A) 2.622 Å], C-H $\cdots$ O [(C(15)-H(15) $\cdots$ O(1) 2.705 Å] and C-H $\cdots$  $\pi$  [(C(15)-H(15) $\cdots$ C(9) 2.884 Å, (C(14)-H(14) $\cdots$ C(10) 2.825 Å] interactions (Fig. S1a, Table S1), antiparallel fashion in compound **2** stabilized by C-H $\cdots$ Cl [(C(18)-H(18) $\cdots$ Cl(4) 2.889 Å, (C(11)-H(11) $\cdots$ Cl(1) 2.768 Å] and C-H $\cdots$  $\pi$  [(C(23)-H(23) $\cdots$ C(10) 2.882 Å, (C(23)-H(23) $\cdots$ C(11) 2.881 Å] interactions (Fig. S1b), and slightly displaced antiparallel fashion in compound **3** stabilized by C-H $\cdots$ F [(C(24)-H(24) $\cdots$ F(2) 2.434 Å], C-H $\cdots$ S [(C(9)-H(9) $\cdots$ S(1) 2.901 Å] and C-H $\cdots$  $\pi$  [(C(9)-H(9) $\cdots$ C(1) 2.876 Å, (C(10)-H(10) $\cdots$ C(18) 2.846 Å] interactions (Fig. S1c). The 1D-supramolecular extend themselves in three dimensions by means of C-H $\cdots$ Cl [(C(5)-H(5B) $\cdots$ Cl(1) 3.017 Å], C-H $\cdots$ S [(C(4)-H(4B) $\cdots$ S(2) 3.068 Å], C-H $\cdots$ O [(C(2)-H(2B) $\cdots$ O(1) 2.814 Å] and C-H $\cdots$  $\pi$  [(C(2)-H(2A) $\cdots$ C(9) 2.935 Å] interactions in compound **1** (Fig. S2a), by means of C-H $\cdots$ Cl [(C(29)-H(29) $\cdots$ Cl(2) 3.262 Å, (C(3)-H(3A) $\cdots$ Cl(1) 3.017 Å], halide $\cdots$  $\pi$  [Cl(2) $\cdots$ C(29) 3.436 Å] and C-H $\cdots$  $\pi$  [(C(15)-H(15) $\cdots$ C(21) 2.848 Å, (C(15)-H(15) $\cdots$ C(22) 2.963 Å] interactions in compound **2** (Fig. S2b), and by means of C-H $\cdots$ O [(C(19)-H(19) $\cdots$ O(1) 2.631 Å, (C(18)-H(18) $\cdots$ O(1) 2.708 Å, (C(13)-H(13) $\cdots$ O(1) 2.668 Å], C-H $\cdots$ S [(C(3)-H(3B) $\cdots$ S(2) 3.068 Å], C-H $\cdots$  $\pi$  [(C(5)-H(5A) $\cdots$ C(8) 2.996 Å, (C(5)-H(5A) $\cdots$ C(10) 2.768 Å, (C(13)-H(13) $\cdots$ C(8) 2.911 Å] interactions in compound **3** (Fig. S2c, Table S1) to provide an overall 3D-network structures.

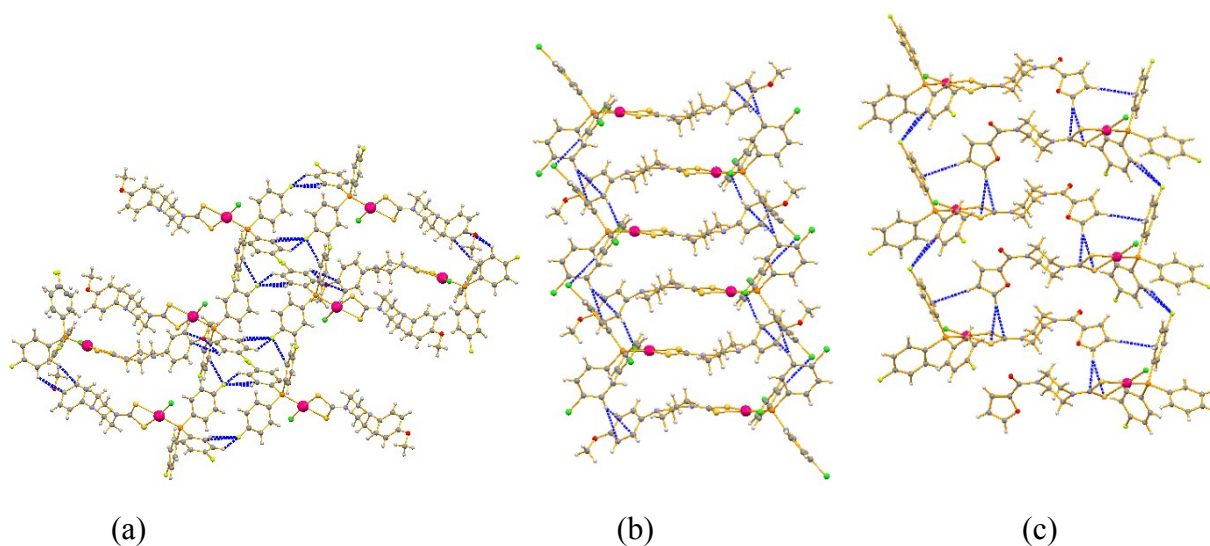

**Figure S1:** The 1D-supramolecular chains in 3D-crystal packing of compounds **1-3**.

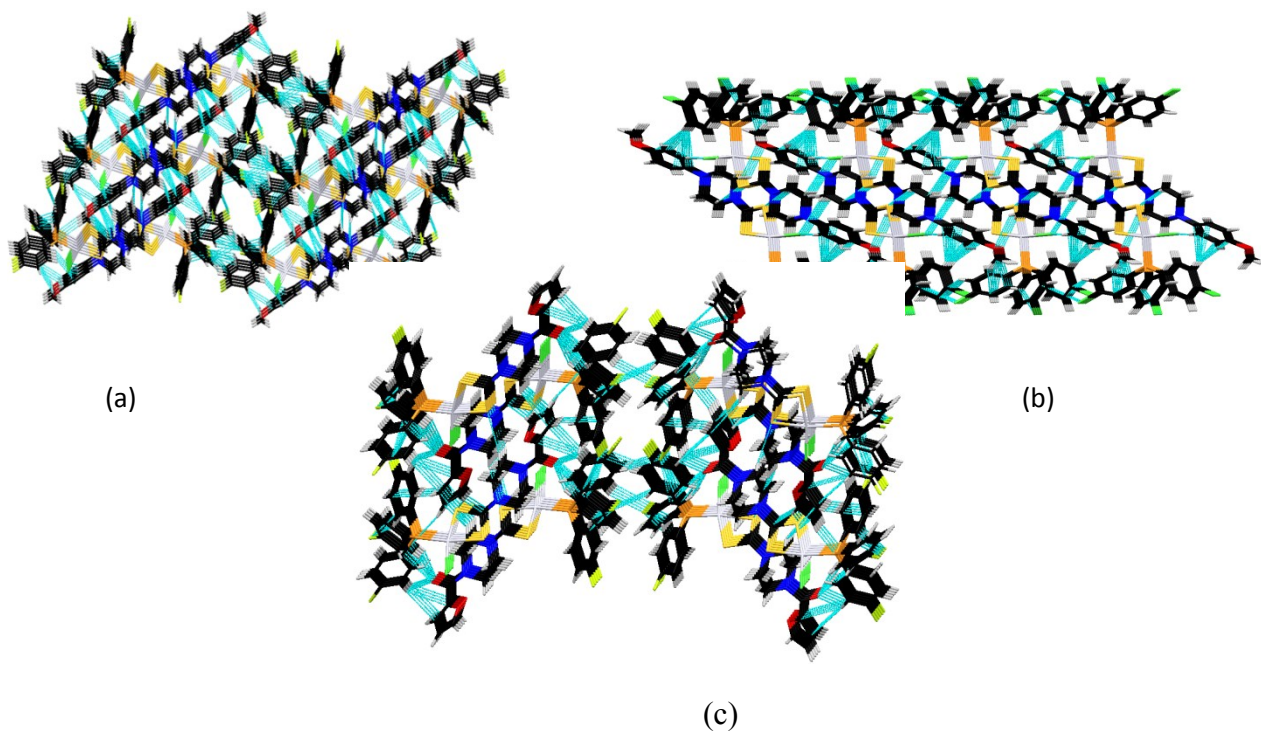

**Figure S2:** The 3D-crystal packing of **1** along *b*-axis (a), **2** along *b*-axis (b) and **3** along *a*-axis (c).

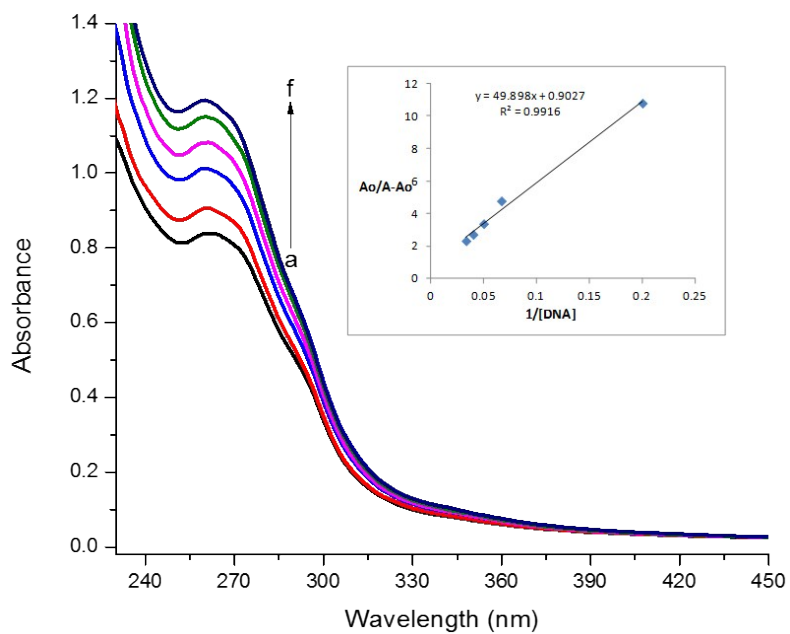

**Figure S3:** Absorbance of 35 $\mu\text{M}$  complex (**1**) in the absence (a) and presence of (b) 5 $\mu\text{M}$ , (c) 15 $\mu\text{M}$ , (d) 20 $\mu\text{M}$ , (e) 25 $\mu\text{M}$  and (f) 30  $\mu\text{M}$  DNA. The inset graph represents the plot of  $A_0/A - A_0^2$  vs.  $1/[\text{DNA}]$  ( $\mu\text{M}^{-1}$ ) for calculation of binding constant (K) and Gibb's free energy ( $\Delta G$ )

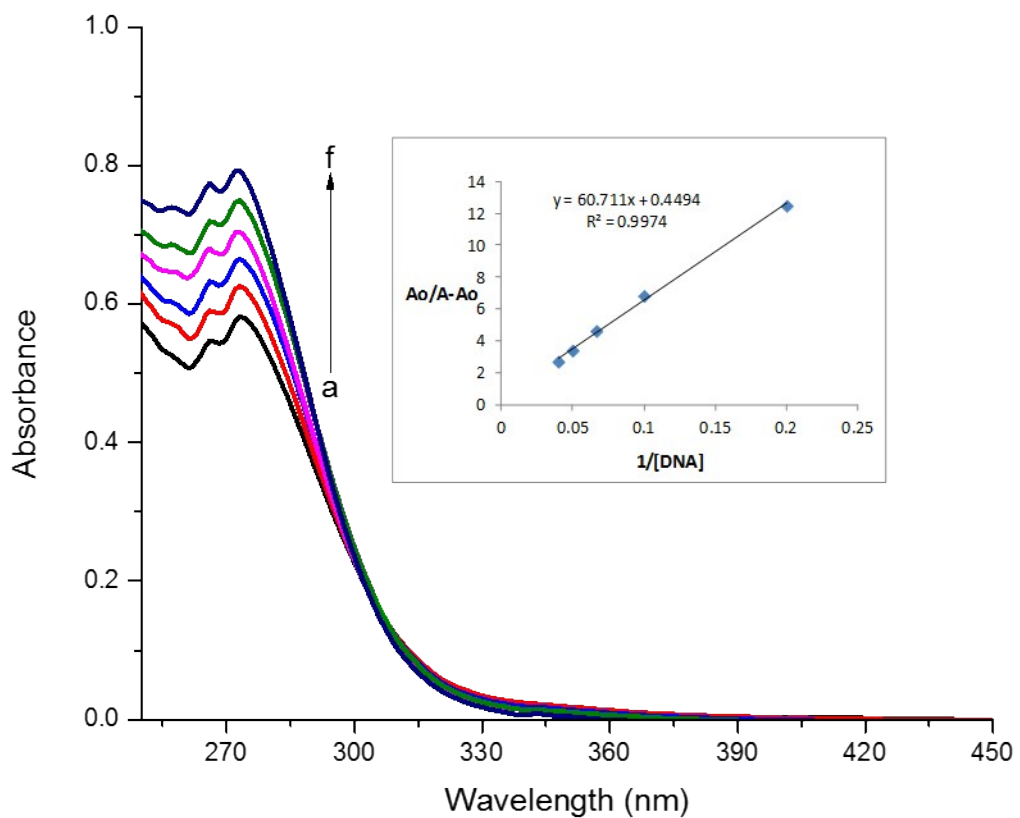

**Figure S4:** Absorbance of 25  $\mu\text{M}$  complex (2) in the absence (a) and presence of (b) 5  $\mu\text{M}$ , (c) 10  $\mu\text{M}$ , (d) 15  $\mu\text{M}$ , (e) 20  $\mu\text{M}$  and (f) 25  $\mu\text{M}$  DNA. The inset graph represents the plot of  $A_{0}/A-A_{0}$  vs.  $1/[\text{DNA}]$  ( $\mu\text{M})^{-1}$  for calculation of binding constant (K) and Gibb's free energy ( $\Delta G$ )

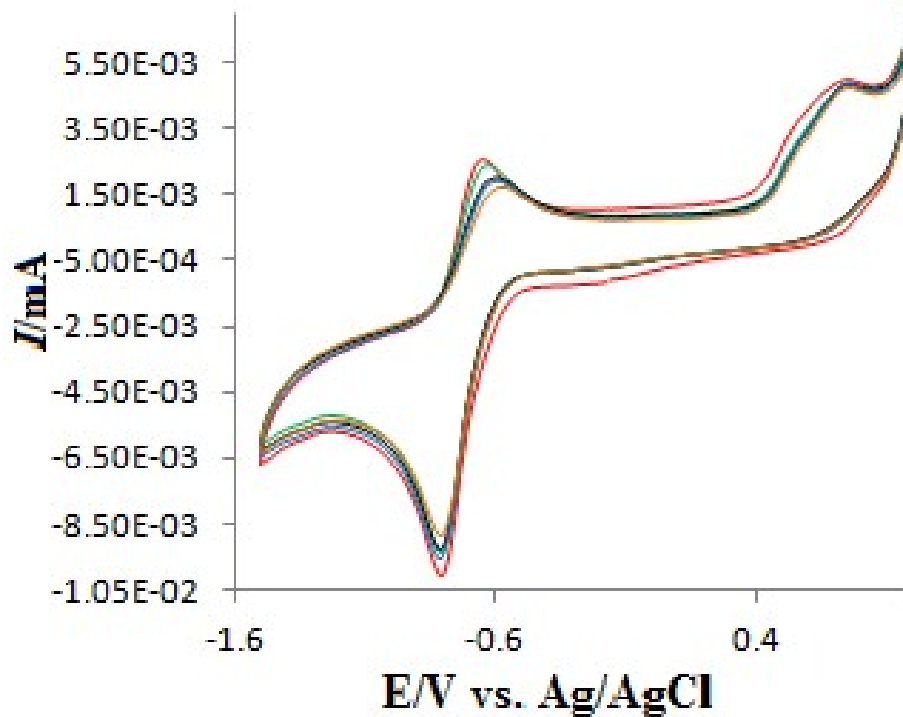

**Figure S5:** Cyclic voltammograms of 1 mM complex **2** with 0.5 M TBAP as supporting electrolyte in the absence (red) and presence of 20  $\mu\text{M}$  DNA (green), 40  $\mu\text{M}$  DNA (black), 60  $\mu\text{M}$  DNA (blue) and 80  $\mu\text{M}$  DNA (orange) showing a decrease in  $I$  from  $I^{\circ}$

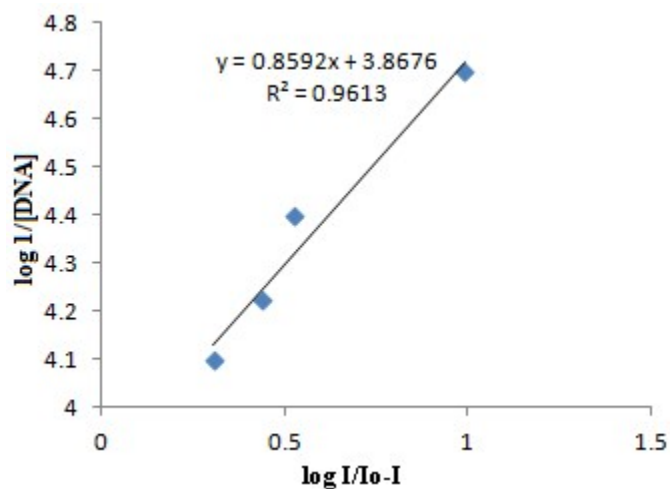

**Figure S6:** Representative plot of  $\log (I/I_0 - I)$  versus  $\log (1/[\text{DNA}])$  for determination of binding constant of complex (**2**).

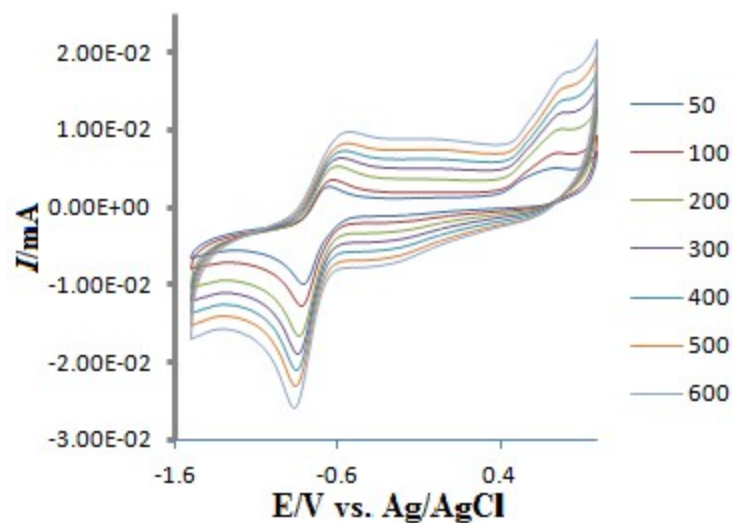

**Figure S7:** Representative cyclic voltammogram of 1mM complex **2** at different (50-600 mVs<sup>-1</sup>) scan rates in DMSO with 0.5 M TBAP as supporting electrolyte.

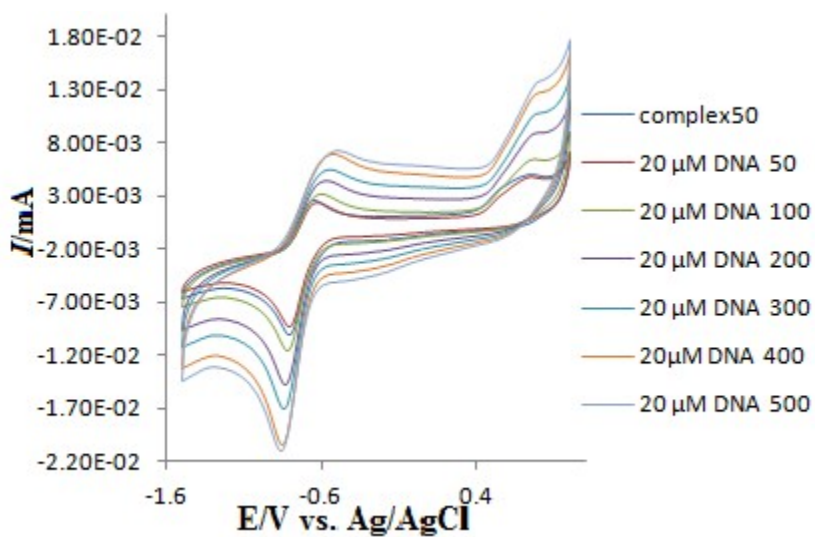

**Figure S8:** Representative cyclic voltammogram of 1mM complex **2** in the presence of 20  $\mu$ M DNA at different (50-500 mVs<sup>-1</sup>) scan rates in DMSO with 0.5 M TBAP as supporting electrolyte.

Table S1: Various weak non-covalent interactions forming 1D and 3D networks for crystal packing

| Complex | $\text{C-H}\cdots\text{X}$    |         | $\text{C-H}\cdots\text{O}$ |                               | $\text{C-H}\cdots\pi$ |                               | $\text{C-H}\cdots\text{S}$ |         | $\text{C-H}\cdots\text{Cl}$ |         | $\text{X}\cdots\pi$ |         |
|---------|-------------------------------|---------|----------------------------|-------------------------------|-----------------------|-------------------------------|----------------------------|---------|-----------------------------|---------|---------------------|---------|
|         | 1D                            | 3D      | 1D                         | 3D                            | 1D                    | 3D                            | 1D                         | 3D      | 1D                          | 3D      | 1D                  | 3D      |
| (1)     | 2.529 Å<br>2.648 Å<br>2.622 Å | -       | 2.705 Å                    | 2.814 Å                       | 2.884 Å<br>2.825 Å    | 2.935 Å                       | -                          | 3.068 Å | -                           | 3.017 Å | -                   | -       |
| (2)     | 2.889 Å<br>2.768 Å            | 3.262 Å | -                          | -                             | 2.882 Å<br>2.881 Å    | 2.848 Å<br>2.963 Å            | -                          | -       | -                           | 3.017 Å | -                   | 3.436 Å |
| (3)     | 2.434 Å                       | -       | -                          | 2.631 Å<br>2.708 Å<br>2.668 Å | 2.876 Å<br>2.846 Å    | 2.996 Å<br>2.768 Å<br>2.911 Å | 2.901 Å                    | 3.068 Å | -                           | -       | -                   | -       |

X= F(1, 3), Cl (2)

## References

1. A. C. Laungani, M. Keller, J. M. Slattery, I. Krossing and B. Breit, *Chem. Eur. J.*, 2009, **15**, 10405-10422.
2. J. A. Howard, V. J. Hoy, D. O'Hagan and G. T. Smith, *Tetrahedron*, 1996, **52**, 12613-12622.
3. V. R. Thalladi, H.-C. Weiss, D. Bläser, R. Boese, A. Nangia and G. R. Desiraju, *J. Am. Chem. Soc.*, 1998, **120**, 8702-8710.
4. J. D. Dunitz and R. Taylor, *Chem. Eur. J.*, 1997, **3**, 89-98.
5. H. Pervez, M. Ahmad, T. B. Hadda, L. Toupet and M. M. Naseer, *J. Mol. Struct.*, 2015, **1098**, 124-129.
6. A. Hameed, Z. Shafiq, M. Yaqub, M. Hussain, H. B. Ahmad, M. N. Tahir and M. M. Naseer, *New J. Chem.*, 2015, **39**, 6052. DOI: 10.1039/C5NJ00734H
7. R. Jawaria, M. Hussain, Z. Shafiq, H. B. Ahmad, M. N. Tahir, H. A. Shad and M. M. Naseer, *Cryst. Eng. Comm.*, 2015, **17**, 2553-2561.
8. F. Anam, A. Abbas, K. M. Lo, S. Hameed and M. M. Naseer, *New J. Chem.*, 2014, **38**, 5617-5625.

9. M. Ahmad, H. Pervez, T. B. Hadda, L. Toupet and M. M. Naseer, *Tetrahedron Lett.*, 2014, **55**, 5400-5403.
10. M. M. Naseer and S. Hameed, *Cryst. Eng. Comm.*, 2012, **14**, 4247-4250.
